# Supplementary material for: MUNDUS project: MUltimodal Neuroprosthesis for daily Upper limb Support
Source: Springer Nature journal article supplement (doi:10.1186/1743-0003-10-66), 2013-01-01

# SCENARIO 1

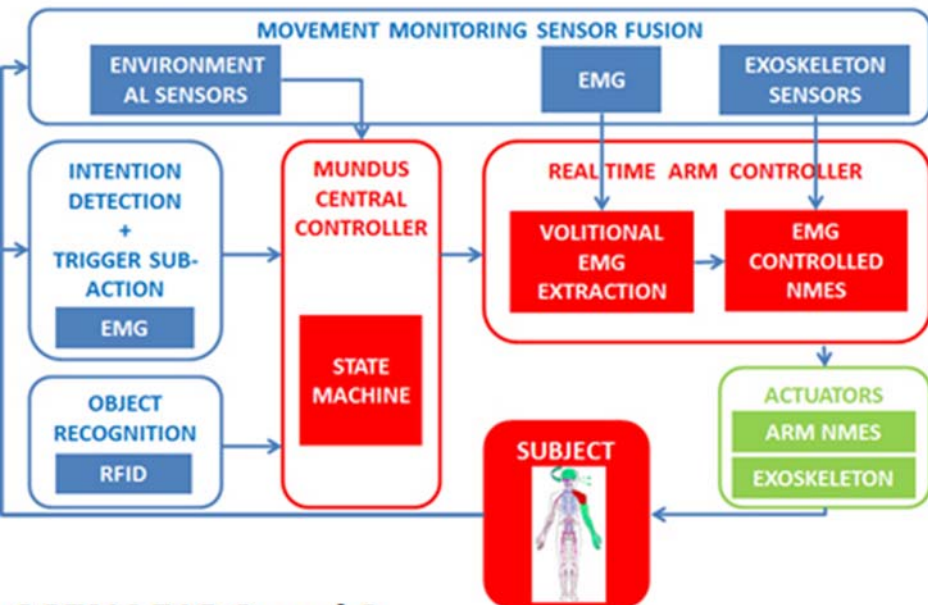

# SCENARIO 2 and 3

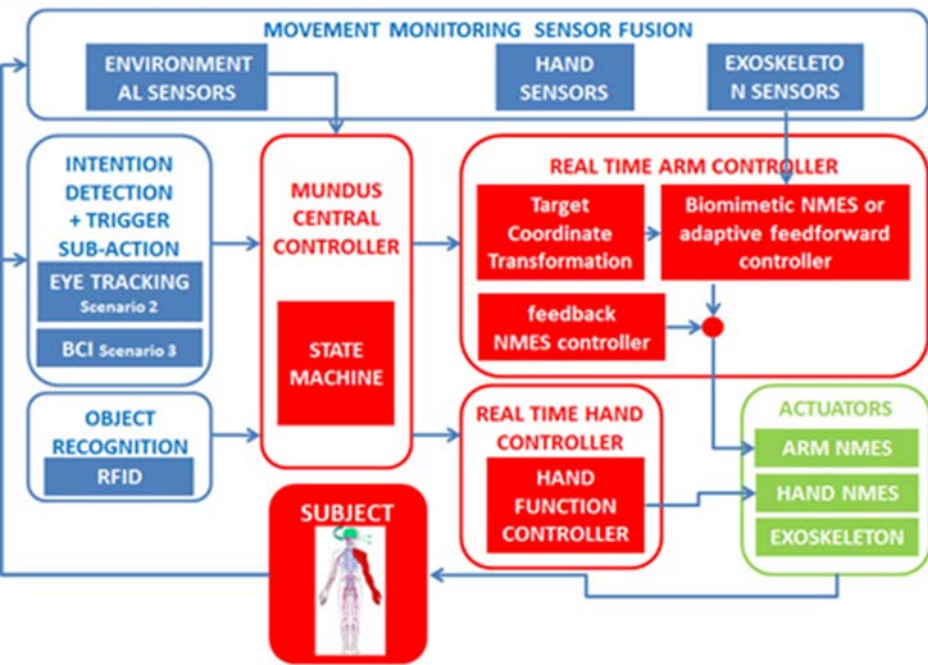

Supplement: 12984_2012_500_MOESM15_ESM.pdf [file 12984_2012_500_MOESM15_ESM.pdf]
